# Supplementary material
Source: PubMed Central journal article supplement (PMC3567266)
Supplement: mmc1.pdf [file mmc1.pdf]

## Supplemental Data

### Common Genetic Risk Factors for Venous Thrombosis in the Chinese Population

Liang Tang, Hua-Fang Wang, Xuan Lu, Xiao-Rong Jian, Bi Jin, Hong Zheng, Yi-Qing Li, Qing-Yun Wang, Tang-Chun Wu, Huan Guo, Hui Liu, Tao Guo, Jian-Ming Yu, Rui Yang, Yan Yang, and Yu Hu

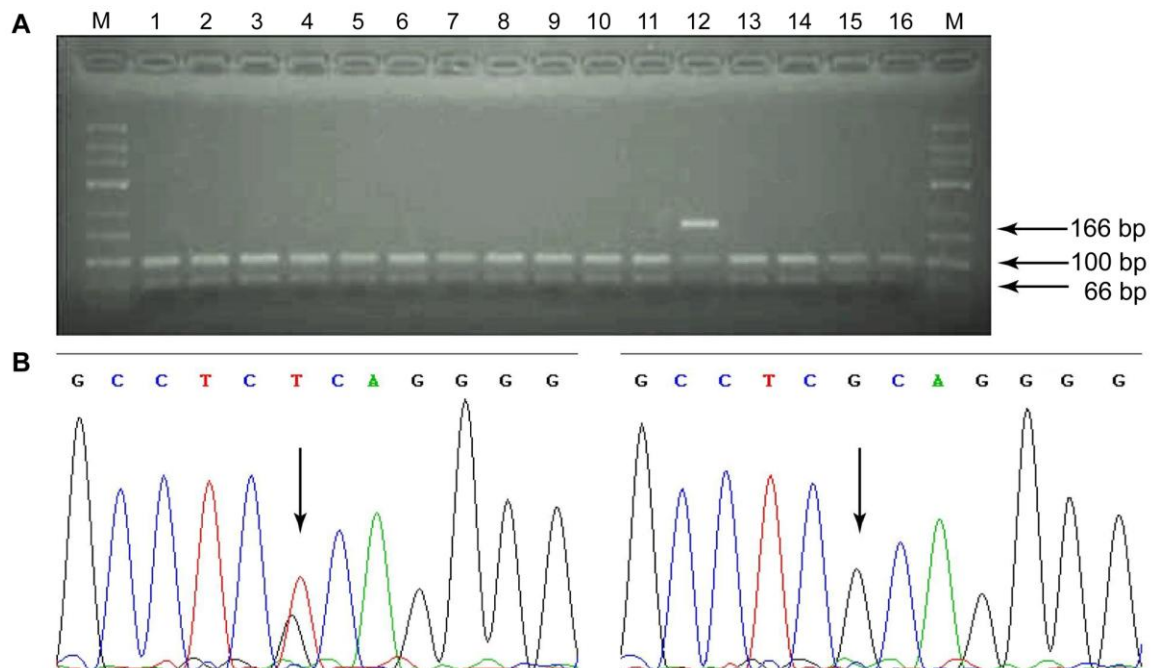

**Figure S1. *THBD* c.-151G>T Variant Detection by PCR-RFLP and Direct Sequencing**

(A) Electrophoretic patterns following *Mwo* I digestion. The PCR products were 178 bp. The amplicons from the wild-type allele had two restriction sites, yielding three bands of 100 bp, 66 bp and 12 bp after digestion. In contrast, the amplified products from the mutant allele lacked one recognition site, generating two fragments of 166 bp and 12 bp. The 12-bp fragment could not be observed. M, DNA marker with a 50-bp ladder. Lanes 1-11 and 13-16, normal individuals. Lane 12, heterozygous individual for the variant. (B) Chromatograms obtained by sequencing. Left, G/T heterozygote; Right, G/G wild-type.

**Table S1. Primers for PCR and Sequencing Used in This Study**

| Region                | Forward Primer (5'-3')            | Reverse Primer (5'-3')            | AT (°C) | Product (bp) |
|-----------------------|-----------------------------------|-----------------------------------|---------|--------------|
| Genomic amplification |                                   |                                   |         |              |
| g.4011-4640           | AAACCTCCTTAGCCGACCC               | CAAGGAAAGCCTGGATTGC               | 58      | 630          |
| g.4493-5042           | TAGGCAGTCCTCCCAAAG                | CAGACACTTCTTGCCGCTG               | 58      | 550          |
| g.4873-5510           | GAGAACCCAGCAATCCGAGTAT            | GTGTTGTGTCTCCCGTAACCC             | 58      | 638          |
| g.5287-5903           | GCGACCTTCCTCAATGCCA               | TCCACGCTGCAGTCCCAAG               | 58      | 617          |
| g.5727-6281           | CTCGATCACCTACGGCACCC              | CAGTTGGCTCTGAAGCACGG              | 58      | 555          |
| g.6205-6731           | TGCCACTGCTACCCTAACTACG            | GCGATGGAGATGCCTATGAG              | 58      | 527          |
| g.6586-7189           | ATTGGCACCGACTGTGACTC              | CAATAACGCTCACCCCTCTG              | 58      | 604          |
| Genotyping            | GCACTTCCTTCCTTTTCCCGA             | CAGAGGGGCACAGGACGC                | 60      | 178          |
| Plasmid construction  | GCCGGTACCGTTACAGGGGTGCTG<br>GCCTT | CCGAAGCTTGGAGCAGAGGGGCAC<br>AGGAC | 64      | 356          |

The amplification regions were designated according to the genomic sequences of *THBD*.
